# Supplementary material
Source: PubMed Central journal article supplement (PMC6533605)

## Supplementary Figure Legends

*Supplementary Figure 1. Allele plots of therapeutic editing at IVS1-110G>A and IVS2-654C>T alleles.*

Consensus splice acceptor and donor sites<sup>1</sup> are illustrated above the aberrant splice sites. a) Enumeration of indel type following sgIVS1-110A SpCas9 RNP editing of  $\beta^+\beta^0_{\#1}$  aligned to IVS1-110A reference. b) Enumeration of indel type following crIVS2-654T LbCas12a RNP editing of  $\beta^+\beta^0_{\#4}$  aligned to IVS2-654T/rs1609812-T reference.

*Supplementary Figure 2. Hemoglobin HPLC traces following therapeutic editing at IVS1-110G>A and IVS2-654C>T alleles.*

a) Top shows hemoglobin HPLC traces in erythroid progeny after sgAAVS1 SpCas9 RNP editing and bottom after sgIVS1-110A SpCas9 RNP editing. b) Top shows hemoglobin HPLC traces in erythroid progeny after crAAVS1 LbCas12a RNP editing and bottom after crIVS2-654T LbCas12a RNP editing. HbA2, HbE, and HbLepore co-migrate.

*Supplementary Figure 3. Edited hematopoietic populations.*

a) Representative gating strategy indicating live singlets with CD34<sup>+</sup> CD38<sup>+</sup> (HPC) and CD34<sup>+</sup> CD38<sup>-</sup> CD90<sup>+</sup> CD45RA<sup>-</sup> (HSC) immunophenotype for sorting populations following editing.

b) Imaging flow cytometry to quantify the circularity of enucleated erythroid progeny following sgAAVS1 or sgIVS1-110A SpCas9 RNP editing.

## Supplementary Tables

Supplementary Table 1.  $\beta$ -thalassemia patient HSPC donor genotypes.

| Donor ID                       | $\beta$ -globin mutation #1 | $\beta$ -globin mutation #2             |
|--------------------------------|-----------------------------|-----------------------------------------|
| $\beta^+\beta^0_{\#1}$         | IVS1-110 G>A                | Codon 39 (C>T; CAG>TAG)                 |
| $\beta^+\beta^0_{\#2}$         | IVS1-110 G>A                | Codon 39 (C>T; CAG>TAG)                 |
| $\beta^+\beta^0_{\#3}$         | IVS1-110 G>A                | Codon 5 (-CT; CCT->C--)                 |
| $\beta^+\beta^+$               | IVS1-110 G>A                | IVS1-110 G>A                            |
| $\beta^+\beta^{\text{Lepore}}$ | IVS1-110 G>A                | Lepore-Boston-Washington deletion       |
| $\beta^+\beta^0_{\#4}$         | IVS2-654 C>T                | Codon 43 (G>T; GAG>TAG)                 |
| $\beta^+\beta^0_{\#5}$         | IVS2-654 C>T                | Codon 41/42 (--CTTT)                    |
| $\beta^+\beta^E_{\#1}$         | IVS2-654 C>T                | Codon 26 (G->A; GAG->AAG; HbE Glu26Lys) |
| $\beta^+\beta^E_{\#2}$         | IVS2-654 C>T                | Codon 26 (G->A; GAG->AAG; HbE Glu26Lys) |

Supplementary Table 2. Linkage between IVS2-654C>T and rs1609812-T.

| Singletons (no.) | IVS2-654C>T  | Genotype at rs1609812 |
|------------------|--------------|-----------------------|
| 3                | Homozygous   | T / T                 |
| 19               | Heterozygous | T / T                 |
| 11               | Heterozygous | T / C                 |

| Family | Relationship | IVS2-654C>T  | Other mutation | Genotype at rs1609812 |
|--------|--------------|--------------|----------------|-----------------------|
| #1     | Father       | Heterozygous | No             | T / T                 |
|        | Mother       | No           | Codons 41/42   | T / T                 |
|        | Daughter     | Heterozygous | Codons 41/42   | T / T                 |
| #2     | Father       | No           | Codon 43       |                       |
|        | Mother       | Heterozygous | No             | T / T                 |
|        | Son          | Heterozygous | Codon 43       | T / C                 |
| #3     | Mother       | Heterozygous | No             | T / T                 |
|        | Offspring    | Heterozygous | No             | T / C                 |

|    |              |              |              |       |
|----|--------------|--------------|--------------|-------|
| #4 | Father       | No           | Codons 41/42 | T / C |
|    | Mother       | Heterozygous | No           | T / C |
|    | Offspring    | No           | No           | C / C |
| #5 | Father       | Heterozygous | No           | T / C |
|    | Mother       | No           | Codon 26     | T / C |
|    | Offspring    | No           | Codon 26     | C / C |
| #6 | Sibling #1   | Heterozygous | No           | T / C |
|    | Sibling #2   | No           | No           | T / T |
|    | Sibling #3   | Heterozygous | No           | T / T |
| #7 | Father       | No           | Codons 41/42 | T / C |
|    | Mother       | Heterozygous | No           | T / C |
|    | Offspring #1 | No           | No           | C / C |
|    | Offspring #2 | No           | Codons 41/42 | T / C |

*Supplementary Table 3. Genomic mismatches to sgIVS1-110A and crIVS2-654T.*

See attached.

*Supplementary Table 4. Aberrant splice site targeting in the thalassemias and other blood disorders.*

See attached.

*Supplementary Table 5. Oligonucleotides used in this study.*

Primers for Sanger analysis.

|                   |                         |
|-------------------|-------------------------|
| IVS1-110_Sanger_F | TGGATGAAGTTGGTGGTGAG    |
| IVS1-110_Sanger_R | AAACATCAAGCGTCCCATAGA   |
| IVS2-654_Sanger_F | TGACCAAATCAGGGTAATTTTGC |
| IVS2-654_Sanger_R | CAGGAGCTGTGGGAGGAAGA    |
| AAVS1_1F          | CACCTTATATTCCCAGGGCCG   |
| AAVS1_1R          | CCTAGGACGCACCATTCTCAC   |

AAVS1\_2F                   ATTGGGTCTAACCCCCACCT  
AAVS1\_2R                   TCAGTGAAACGCACCAGACA

Primers for deep sequencing.

IVS1-110\_deep\_3F-HBBsp           CTCCTGAGGAGAAGTCTGCCGTTAC  
IVS1-110\_deep\_3R-HBBsp           GCAGCTCACTCAGTGTGGC  
IVS1-110\_deep\_1F           TGGGCAGGTTGGTATCAAGG  
IVS1-110\_deep\_1R           GCACTTTCTTGCCATGAGCC  
IVS2-654\_deep\_2F           CTCTTTCTTTCAGGGCAATAATGATAC  
IVS2-654\_deep\_2R           CCAGCCTTATCCCAACCATAAA

Primers for RT-PCR.

HBB-exon1\_F               GCAAGGTGAACGTGGATGAAGTT  
HBB-exon2\_R               GGACAGATCCCCAAAGGACTCAA  
HBB-S\_qPCR                TGAGGAGAAGTCTGCCGTTAC  
HBB\_exon3\_R               CACCAGCCACCACTTTCTGA

Primers for RT-qPCR.

HBB-S\_qPCR                TGAGGAGAAGTCTGCCGTTAC  
HBB-AS\_qPCR               ACCACCAGCAGCCTGCCCA  
HBB\_e2-e3                 TTCAGGCTCCTGGGCAAC  
R\_HBB\_exon3               CACCAGCCACCACTTTCTGA  
HBA-S\_qPCR                GCCCTGGAGAGGATGTTC  
HBA-A\_qPCR                TTCTTGCCGTGGCCCTTA  
HBG-S\_qPCR                GGTTATCAATAAGCTCCTAGTCC  
HBG-AS\_qPCR               ACAACCAGGAGCCTTCCCA  
HBD\_RT93\_e1\_F             GAGGAGAAGACTGCTGTCAATG  
HBD\_RT93\_e2\_R             AGGGTAGACCACCAGTAATCTG

## Supplementary References

1. Ma, S. L. *et al.* Whole Exome Sequencing Reveals Novel PHEX Splice Site Mutations in Patients with Hypophosphatemic Rickets. 1–12 (2015). doi:10.1371/journal.pone.0130729



Supplementary Figure 2

a

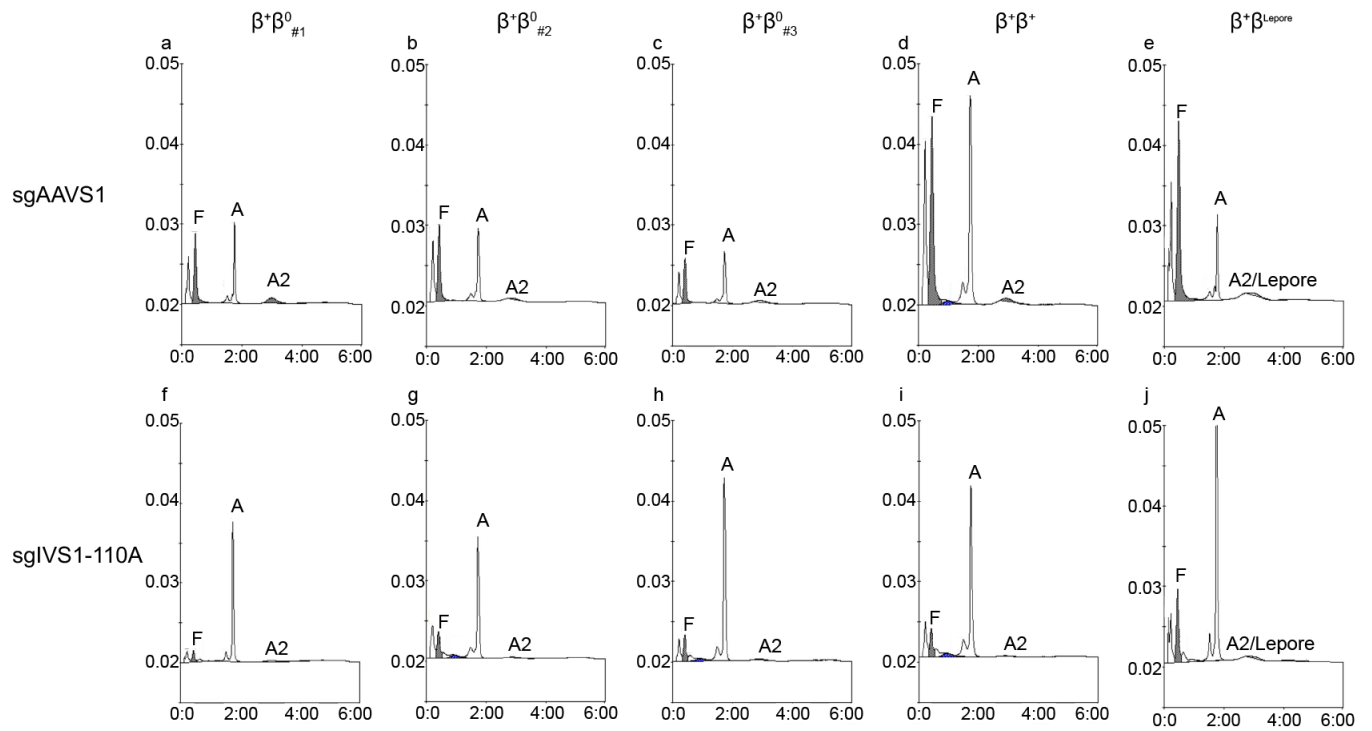

b

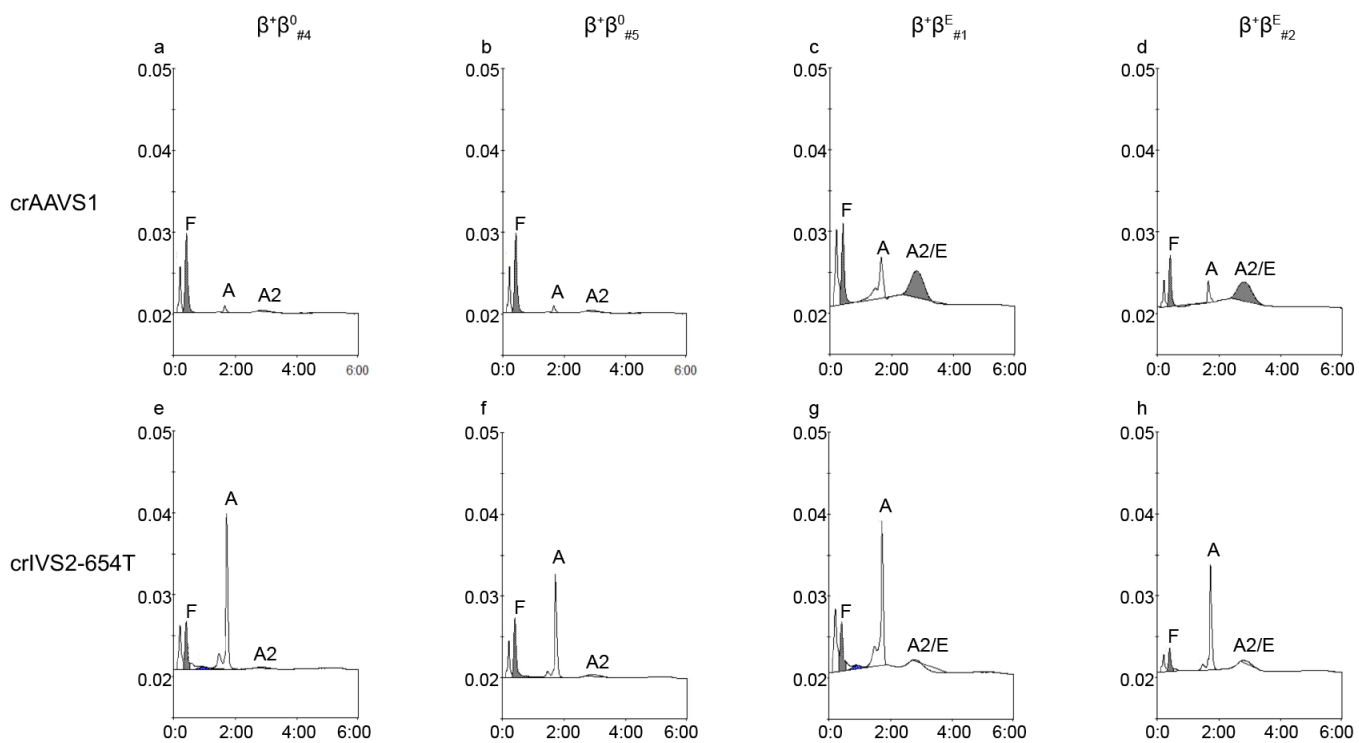

Supplementary Figure 3

a

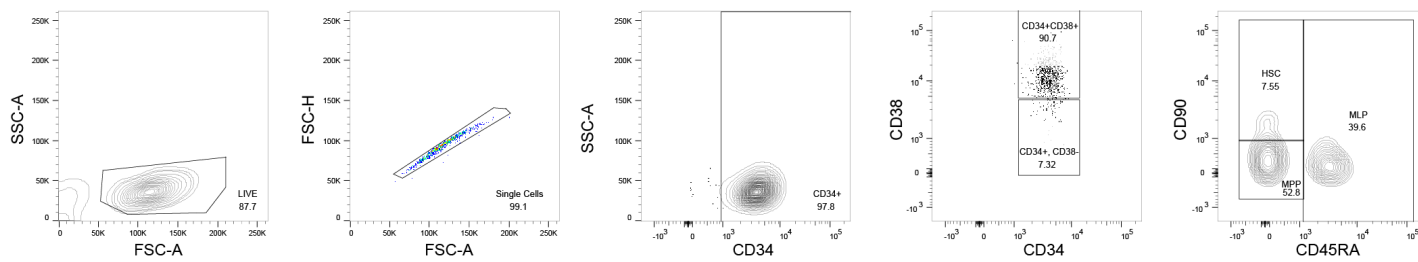

b

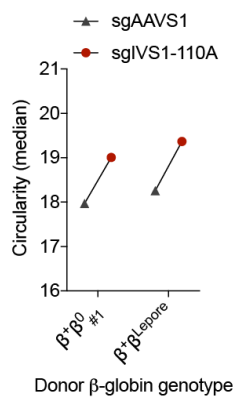

Supplement: blood895094-suppl1.pdf [file blood895094-suppl1.pdf]
